# Supplementary material for: A “Turn-On” fluorescent probe for sensitive and selective detection of fluoride ions based on aggregation-induced emission
Source: PubMed Central journal article supplement — RSC Adv. 2018 Sep 19;8(57):32497–505. doi: 10.1039/c8ra06774k (PMC9086254; doi:10.1039/c8ra06774k), 2018-09-19
Supplement: RA-008-C8RA06774K-s001.pdf [file RA-008-C8RA06774K-s001.pdf]

## Electronic Supplementary Information

### A “Turn-On” fluorescent probe for sensitive and selective detection of fluoride ions based on aggregation-induced emission

Man Du, Baolong Huo, Mengwen Li, Ao Shen, Xue Bai, Yaru Lai, Jiemin Liu\*,  
Yunxu Yang\*

*Department of Chemistry and Chemical Engineering, School of Chemistry and  
Biological Engineering, University of Science and Technology Beijing, Beijing  
100083, China*

**Corresponding Author:** Yunxu Yang, Jiemin Liu

E-mail addresses: [yxyang@ustb.edu.cn](mailto:yxyang@ustb.edu.cn) (Yunxu Yang);

[liujm@ustb.edu.cn](mailto:liujm@ustb.edu.cn) (Jiemin Liu)

## Contents:

|                                                                                                                     |           |
|---------------------------------------------------------------------------------------------------------------------|-----------|
| <b>Table S1</b> Comparisons of proposed method with recently reported strategies for F <sup>-</sup> detection.      | <b>3</b>  |
| <b>Fig. S1</b> Structures of probes recently reported for F <sup>-</sup> detection.                                 | <b>4</b>  |
| <b>Fig. S2</b> Fluorescent spectra of <b>HB</b> T in the THF/H <sub>2</sub> O mixture at different water fractions. | <b>5</b>  |
| <b>Fig. S3</b> UV-vis spectra of <b>PBT</b> in the absence and presence of F <sup>-</sup> .                         | <b>5</b>  |
| <b>Fig. S4</b> Effect of pH on the Fluorescence intensity of <b>PBT</b> .                                           | <b>6</b>  |
| <b>Fig. S5</b> <sup>1</sup> H NMR spectrum of compound <b>HB</b> T in CDCl <sub>3</sub> -d <sub>1</sub> .           | <b>7</b>  |
| <b>Fig. S6</b> <sup>13</sup> C NMR spectrum of compound <b>HB</b> T in CDCl <sub>3</sub> -d <sub>1</sub> .          | <b>7</b>  |
| <b>Fig. S7</b> HRMS spectrum of compound <b>HB</b> T in CH <sub>3</sub> CN.                                         | <b>8</b>  |
| <b>Fig. S8</b> <sup>1</sup> H NMR spectrum of compound <b>PBT</b> in CDCl <sub>3</sub> -d <sub>1</sub> .            | <b>8</b>  |
| <b>Fig. S9</b> <sup>13</sup> C NMR spectrum of compound <b>PBT</b> in CDCl <sub>3</sub> -d <sub>1</sub> .           | <b>9</b>  |
| <b>Fig. S10</b> HRMS spectrum of compound <b>PBT</b> in CH <sub>3</sub> CN.                                         | <b>9</b>  |
| Detection limit                                                                                                     |           |
| <b>Fig. S11</b> The linear relationship between the fluorescence intensity and F <sup>-</sup> concentration.        | <b>10</b> |
| <b>Fig. S12</b> Job's plot for determining the stoichiometry of <b>PBT</b> and F <sup>-</sup> .                     | <b>11</b> |
| Kinetic studies                                                                                                     |           |
| <b>Fig. S13</b> <i>Pseudo</i> -first-order kinetic plot.                                                            | <b>12</b> |
| <b>Fig. S14</b> ESI-MS spectrum of <b>PBT</b> upon addition of F <sup>-</sup> .                                     | <b>13</b> |
| <b>Fig. S15</b> The fluorescence spectra change of <b>PBT</b> upon addition of F <sup>-</sup> from toothpastes.     | <b>14</b> |
| <b>References</b>                                                                                                   | <b>15</b> |

**Table S1.** Comparisons of proposed method with recently reported strategies for F<sup>-</sup> detection.

| Literature | Mechanism                                       | Fluorophore                         | Wavelength/nm                                                                                                                                                                  | Detection limit                        | Dynamic range                                                  | Response time |
|------------|-------------------------------------------------|-------------------------------------|--------------------------------------------------------------------------------------------------------------------------------------------------------------------------------|----------------------------------------|----------------------------------------------------------------|---------------|
| [1]        | P-O cleavage                                    | Dichlorofluorescein                 | $\lambda_{\text{ex}} = 510 \text{ nm}$ ,<br>$\lambda_{\text{em}} = 536 \text{ nm}$                                                                                             | 9.8 nM                                 | —                                                              | 10 min        |
| [2]        | Formation of hydrogen bonds with F <sup>-</sup> | 1,8-Naphthalimide and Benzothiazole | $\lambda_{\text{ex}} = 415 \text{ nm}$                                                                                                                                         | 0.41 $\mu\text{M}$                     | —                                                              | 10 s          |
| [3]        | AIE                                             | Tetraphenylethene                   | $\lambda_{\text{em}} = 560 \text{ nm}$                                                                                                                                         | $6 \times 10^{-4} \text{ M}$           | —                                                              | 2 min         |
| [4]        | Si-O cleavage                                   | Luciferin                           | —                                                                                                                                                                              | 1 $\mu\text{M}$                        | 0 to 100 $\mu\text{M}$                                         | —             |
| [5]        | Si-O cleavage                                   | 7-Diethylaminocoumarin              | $\lambda_{\text{ex}} = 490 \text{ nm}$                                                                                                                                         | $1.2 \times 10^{-8} \text{ M}$         | 0 to $4 \times 10^{-5} \text{ M}$                              | —             |
| [6]        | Si-C cleavage                                   | BODIPYs                             | $\lambda_{\text{em}} = 614\text{-}687 \text{ nm}$                                                                                                                              | 14.9-92.7 nM                           | —                                                              | 20-40 min     |
| [7]        | Si -O cleavage                                  | 7-Hydroxycoumarin                   | $\lambda_{\text{ex}} = 375 \text{ nm}$                                                                                                                                         | 0.285 $\mu\text{M}$                    | 0 to 60 $\mu\text{M}$                                          | —             |
| [8]        | Lewis acid anion receptors                      | Naphthalene diimide                 | $\lambda_{\text{ex}1} = 475 \text{ nm}$ ,<br>$\lambda_{\text{em}1} = 545 \text{ nm}$ ,<br>$\lambda_{\text{ex}2} = 362 \text{ nm}$ ,<br>$\lambda_{\text{em}2} = 530 \text{ nm}$ | 17 $\mu\text{M}$ ;<br>18 $\mu\text{M}$ | 0 to 400 $\mu\text{M}$ ;<br>0 to 230 $\mu\text{M}$             | —             |
| [9]        | Deprotonation of the N-H proton                 | 1,8-Naphthalimide                   | $\lambda_{\text{ex}} = 460 \text{ nm}$ ,<br>$\lambda_{\text{em}} = 525 \text{ nm}$                                                                                             | 1.8 $\mu\text{M}$                      | 0 to 23.3 $\mu\text{M}$                                        | —             |
| [10]       | Si-O cleavage                                   | Naphthalimide                       | $\lambda_{\text{ex}} = 430 \text{ nm}$ ,<br>$\lambda_{\text{em}} = 550 \text{ nm}$                                                                                             | 5.27 $\mu\text{M}$                     | 0 to 160 $\mu\text{M}$                                         | 50 s          |
| [11]       | Si-O cleavage                                   | Spiropyran                          | —                                                                                                                                                                              | $8.3 \times 10^{-8} \text{ M}$         | $5.0 \times 10^{-8}$<br>to<br>$1.0 \times 10^{-8} \mu\text{M}$ | 30 min        |
| [12]       | Deprotonation                                   | Benzimidazole                       | $\lambda_{\text{ex}} = 425 \text{ nm}$ ,<br>$\lambda_{\text{em}1} = 510 \text{ nm}$ ,<br>$\lambda_{\text{em}2} = 592 \text{ nm}$                                               | $3.45 \times 10^{-10} \text{ M}$       | —                                                              | 1 min         |
| [13]       | Breakage of the B-O bonds                       | QDs                                 | $\lambda_{\text{ex}} = 350 \text{ nm}$ ,<br>$\lambda_{\text{em}} = 625 \text{ nm}$                                                                                             | 0.4 $\mu\text{M}$                      | 0.4 to 2.8 $\mu\text{M}$                                       | —             |
| Our work   | P-O cleavage<br>AIE                             | HBT                                 | $\lambda_{\text{ex}} = 335 \text{ nm}$ ,<br>$\lambda_{\text{em}} = 470 \text{ nm}$                                                                                             | 3.8 nM                                 | 0.5 to 10 $\mu\text{M}$                                        | 2 min         |

“—“ Not mentioned.

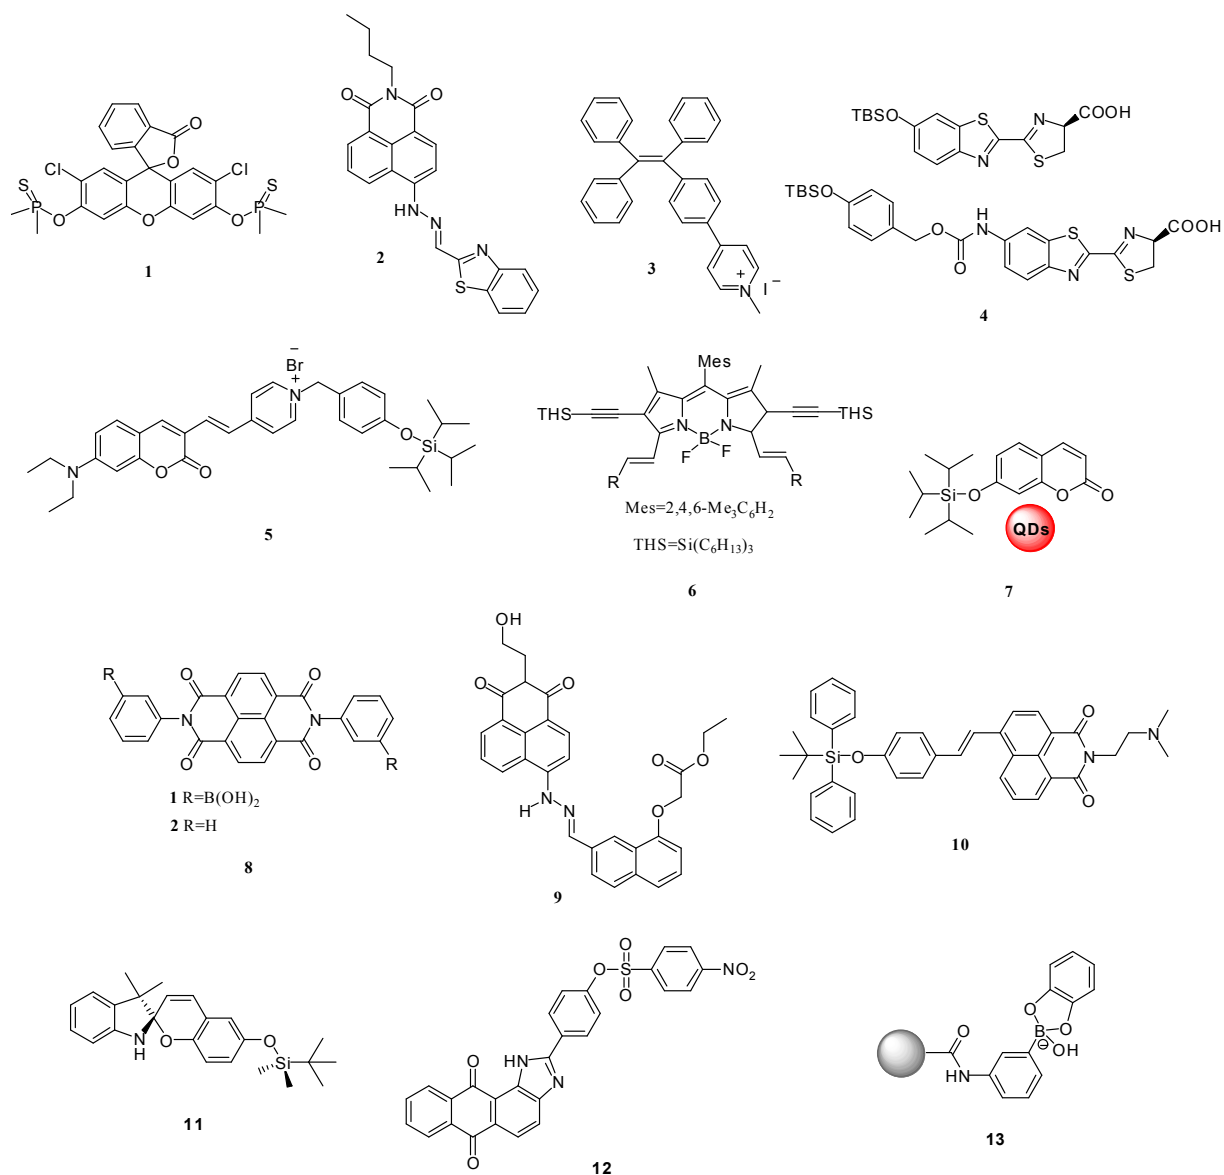

**Fig. S1.** Structures of probes recently reported for F<sup>-</sup> detection.

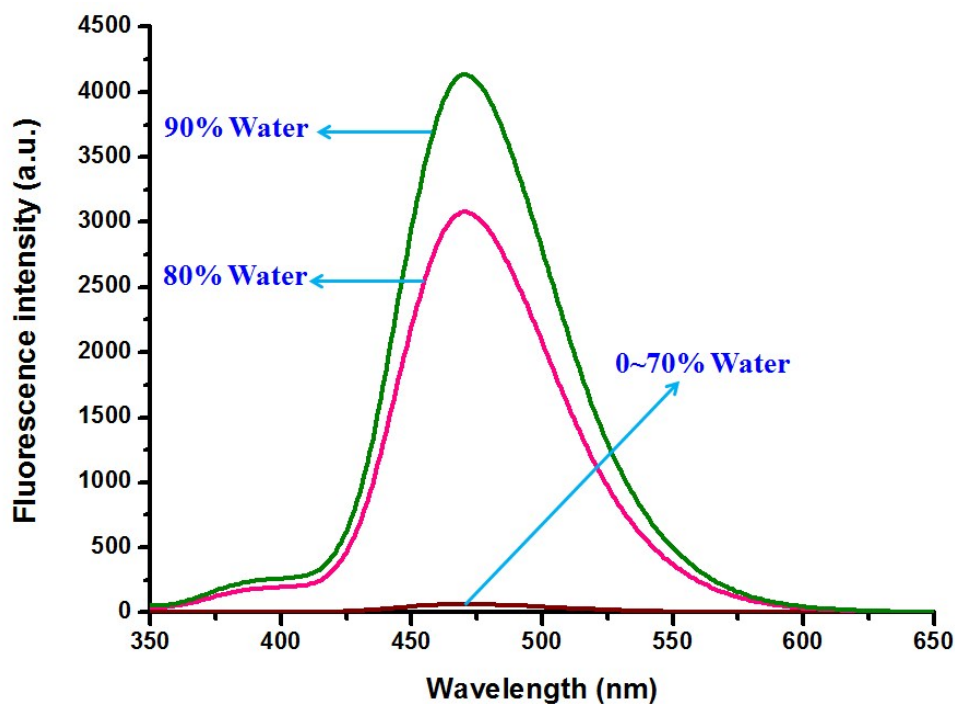

**Fig. S2.** Fluorescent spectra of **HBT** (10 μM) in the THF / H<sub>2</sub>O mixture at different water fractions,  $\lambda_{\text{ex}}=335$  nm,  $\lambda_{\text{em}}=470$  nm.

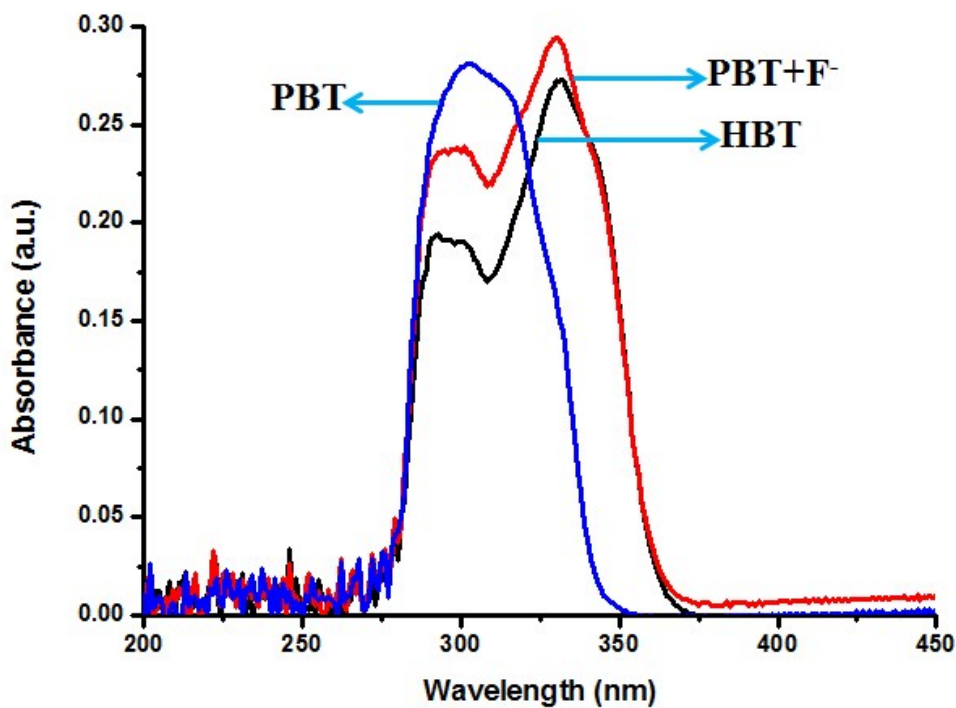

**Fig. S3.** UV-vis spectra of **PBT** in the absence and presence of F<sup>-</sup>. [**PBT** is 10 μM], [F<sup>-</sup> is 20 μM] in a mixture of THF and Tris buffer solution (pH 8.0), (1 : 9, v / v).

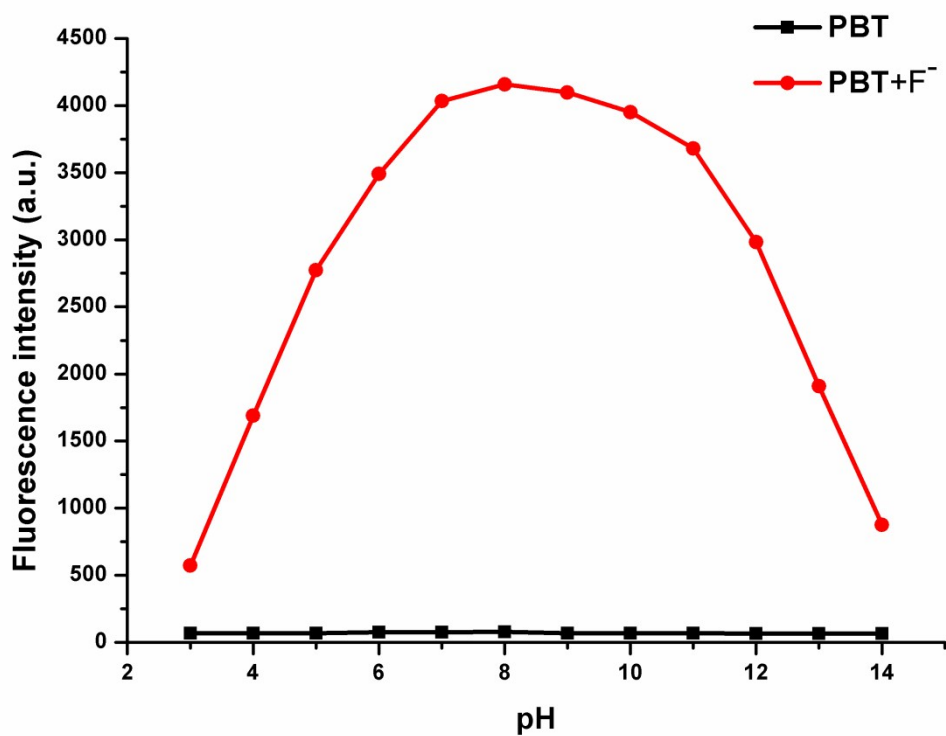

**Fig. S4.** Effect of pH on the Fluorescence intensity of **PBT** in the absence and presence of F<sup>-</sup>. [**PBT** is 10  $\mu$ M], [F<sup>-</sup> is 20  $\mu$ M] in a mixture of THF and buffer solution (1 : 9, v / v, 25 °C),  $\lambda_{\text{ex}}$ =335 nm,  $\lambda_{\text{em}}$ =470 nm.

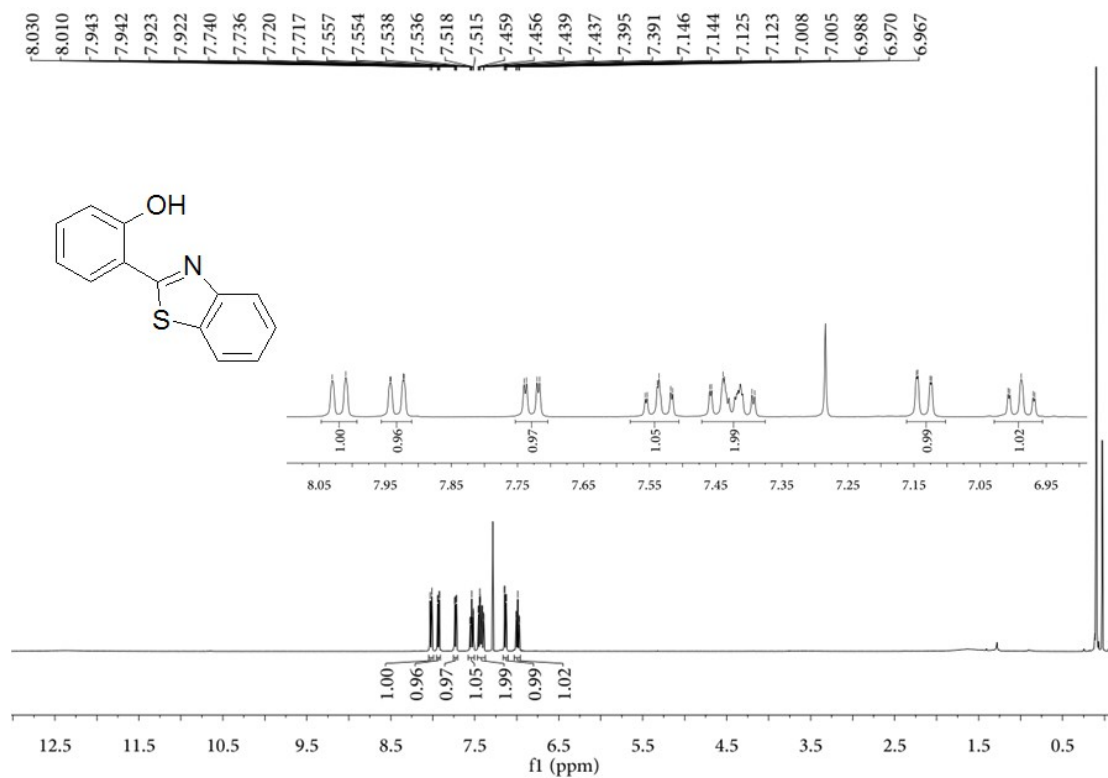

**Fig. S5.** <sup>1</sup>H NMR spectrum of compound **HBT** in CDCl<sub>3</sub>-d<sub>1</sub>.

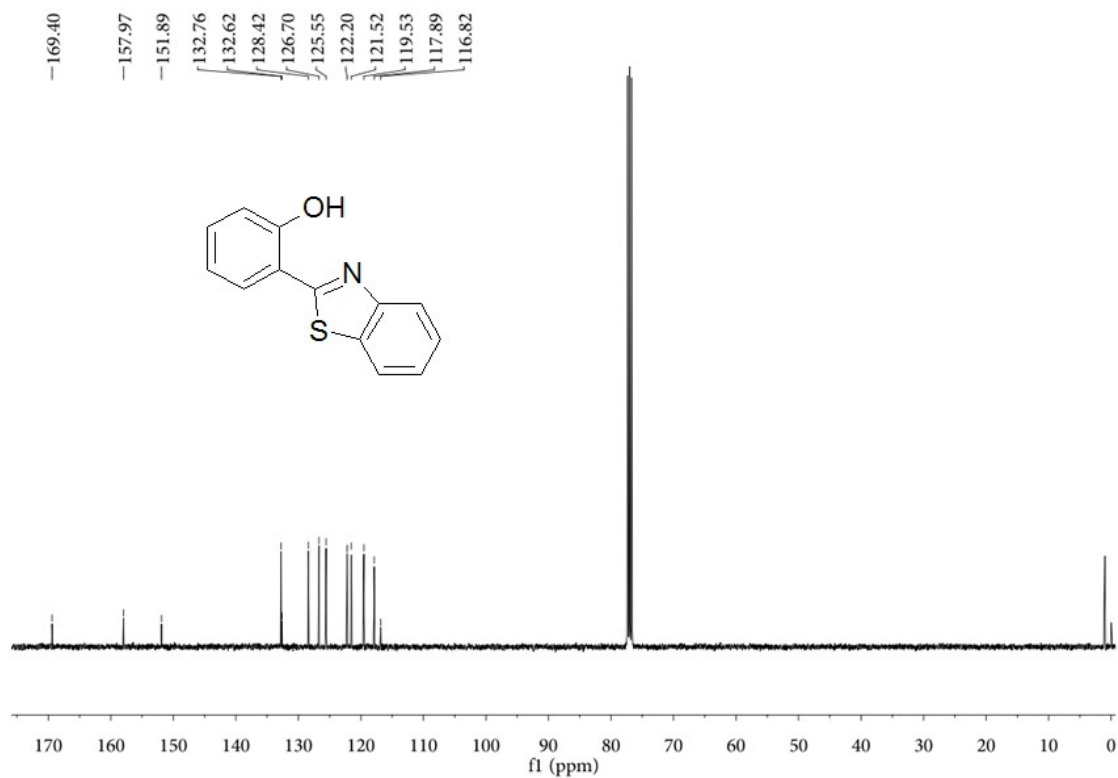

**Fig. S6.** <sup>13</sup>C NMR spectrum of compound **HBT** in CDCl<sub>3</sub>-d<sub>1</sub>.

Duman-; #21 RT: 0.12 AV: 1 NL: 1.15E9  
T: FIMS+p ESI Full ms [50.0000-750.0000]

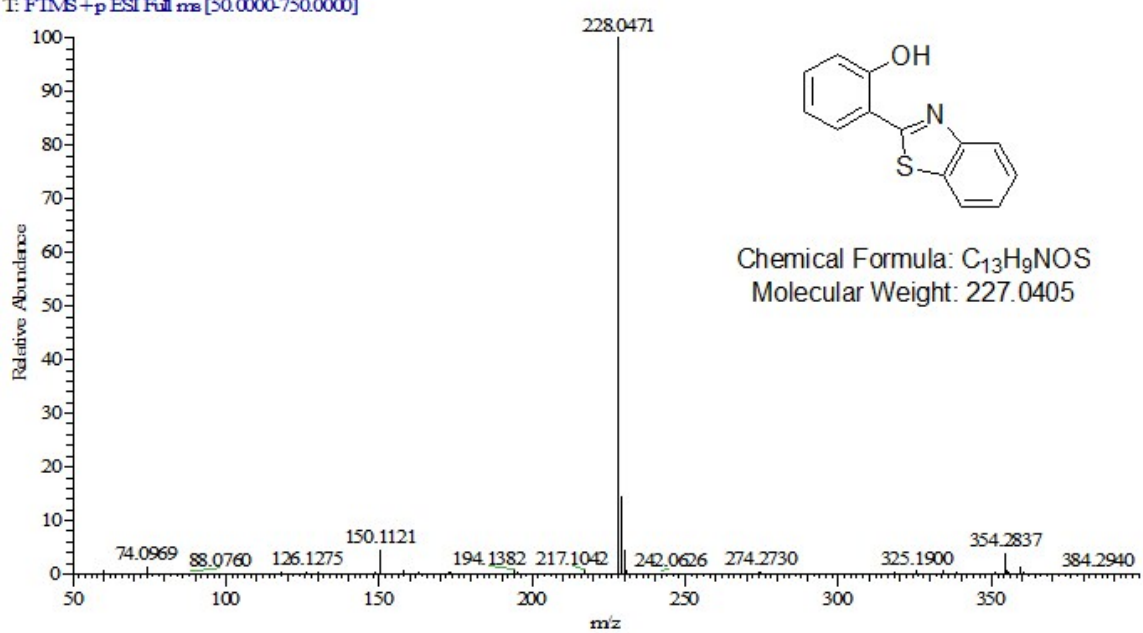

Fig. S7. HRMS spectrum of compound **HBT** in CH<sub>3</sub>CN.

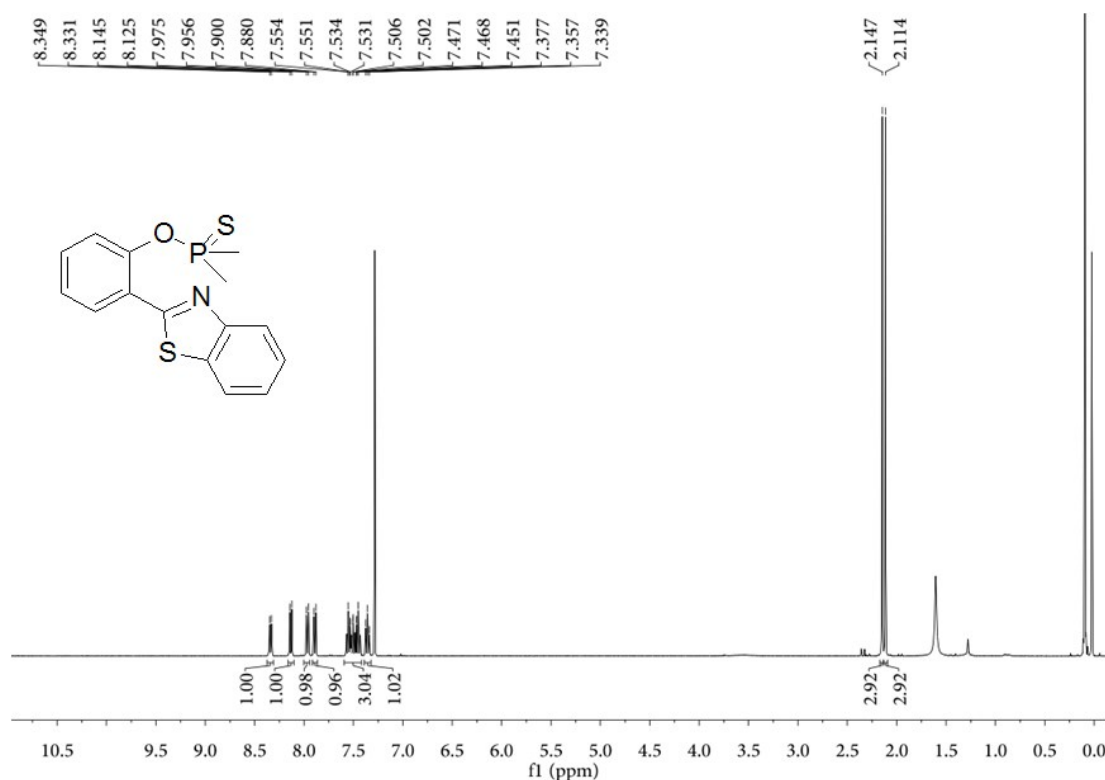

Fig. S8. <sup>1</sup>H NMR spectrum of compound **PBT** in CDCl<sub>3</sub>-d<sub>1</sub>.



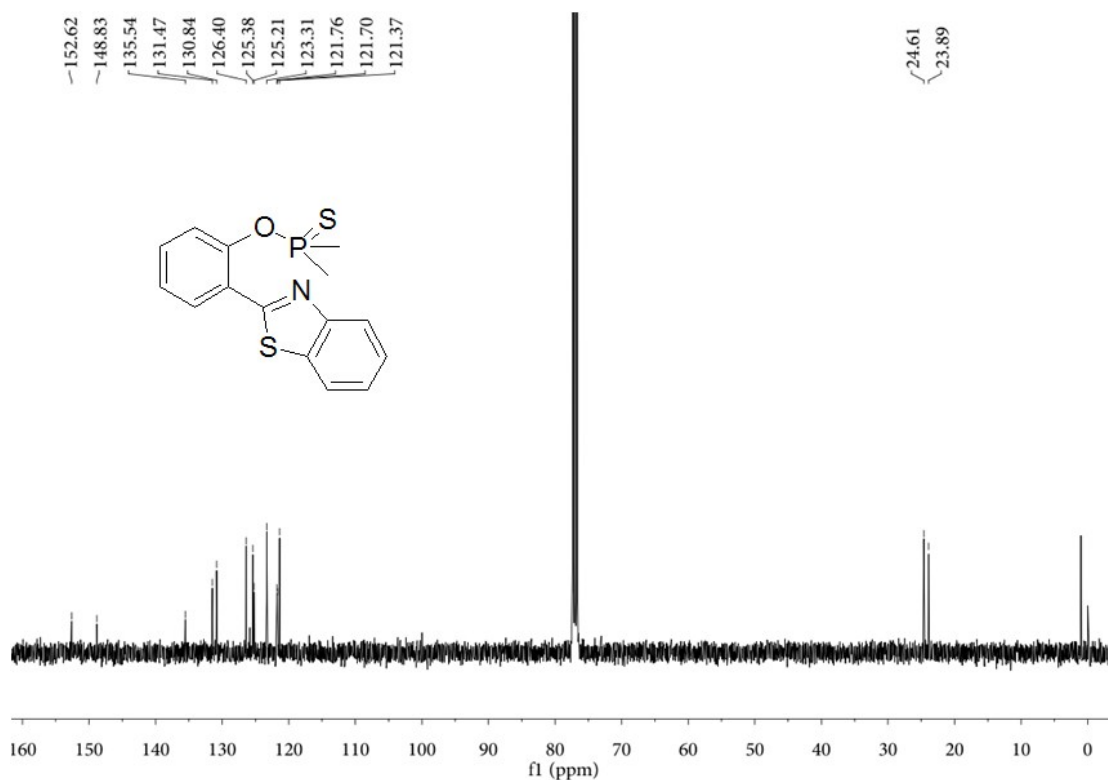

Fig. S9.  $^{13}\text{C}$  NMR spectrum of compound **PBT** in  $\text{CDCl}_3\text{-d}_1$ .

Duman-2#20 RE 0.11 AV: 1 NL: 2.04E8  
T: FIMS+pESI:Full.ms [50.0000-750.0000]

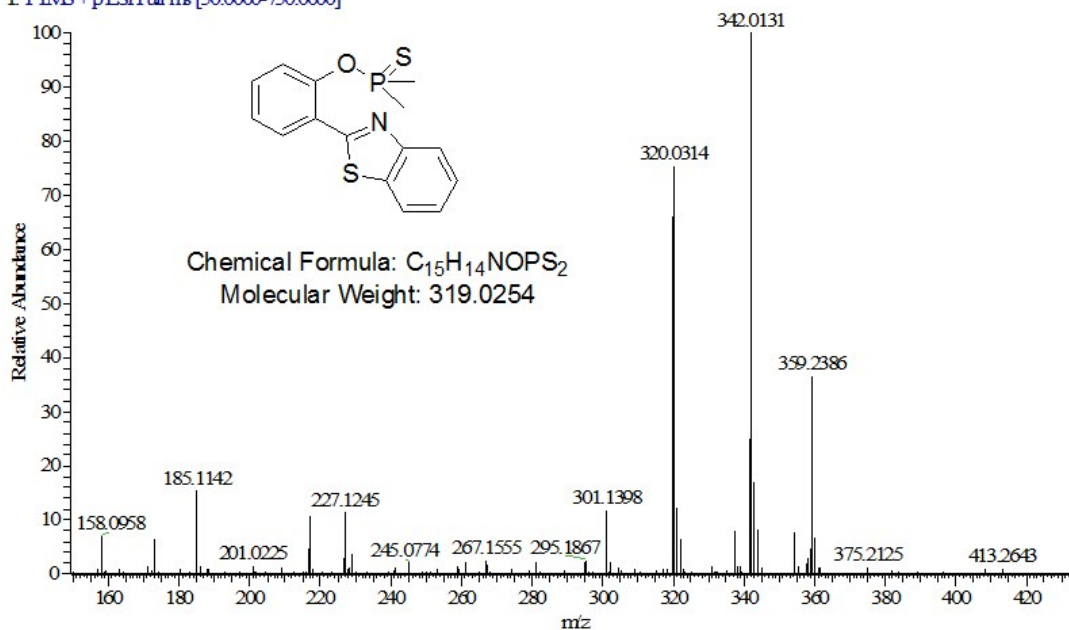

Fig. S10. HRMS spectrum of probe compound **PBT** in  $\text{CH}_3\text{CN}$ .

## Detection limit

The detection limit for F<sup>-</sup> ions was calculated by the fluorescence titration experiments according to the reported method. A good linear relationship between the fluorescence intensity and F<sup>-</sup> concentration (0.5 μM-10 μM) could be obtained (R<sup>2</sup>=0.9995). The value obtained for the F<sup>-</sup> was found to be 3.8 nM by the equation of  $L_{OD}=3\delta/m$  ( $\delta$  was the standard deviation of the blank solution and  $m$  is the absolute value of the slope between intensity versus F<sup>-</sup> concentration).  $\delta= 0.4880$ ,  $m= 389.7332$ .

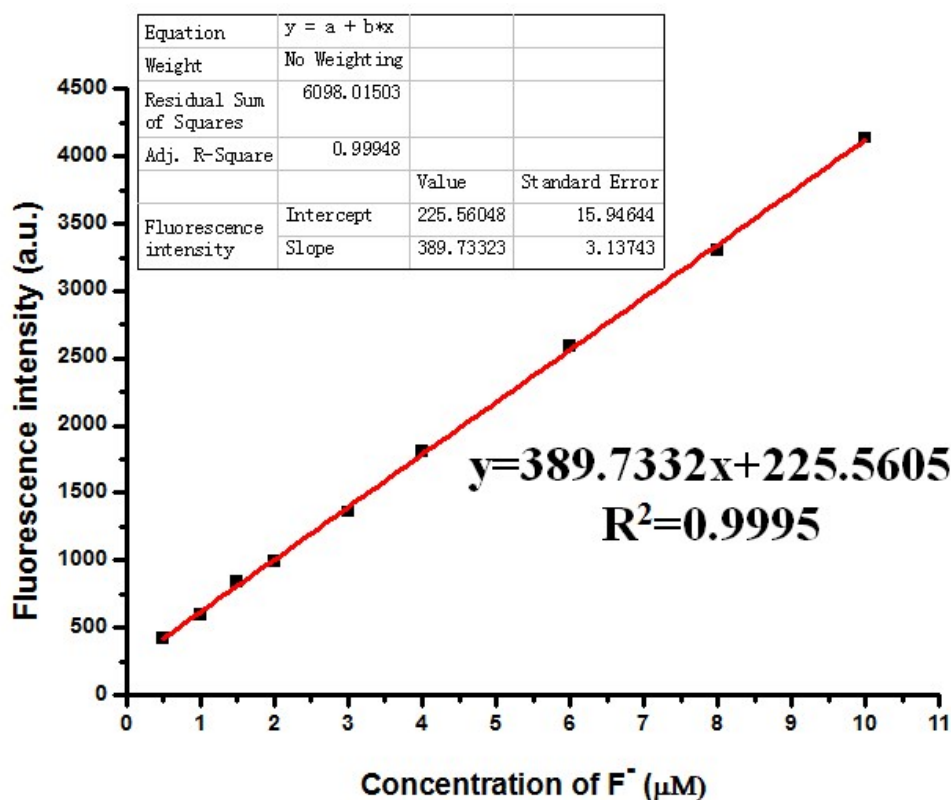

**Fig. S11.** The linear relationship between the fluorescence intensity and F<sup>-</sup> concentration (0.5-10 μM). All measurements were taken in a mixture of THF and Tris buffer solution (pH 8.0), (1 : 9, v / v) at 25 °C.  $\lambda_{ex}=335$  nm,  $\lambda_{em}=470$  nm.

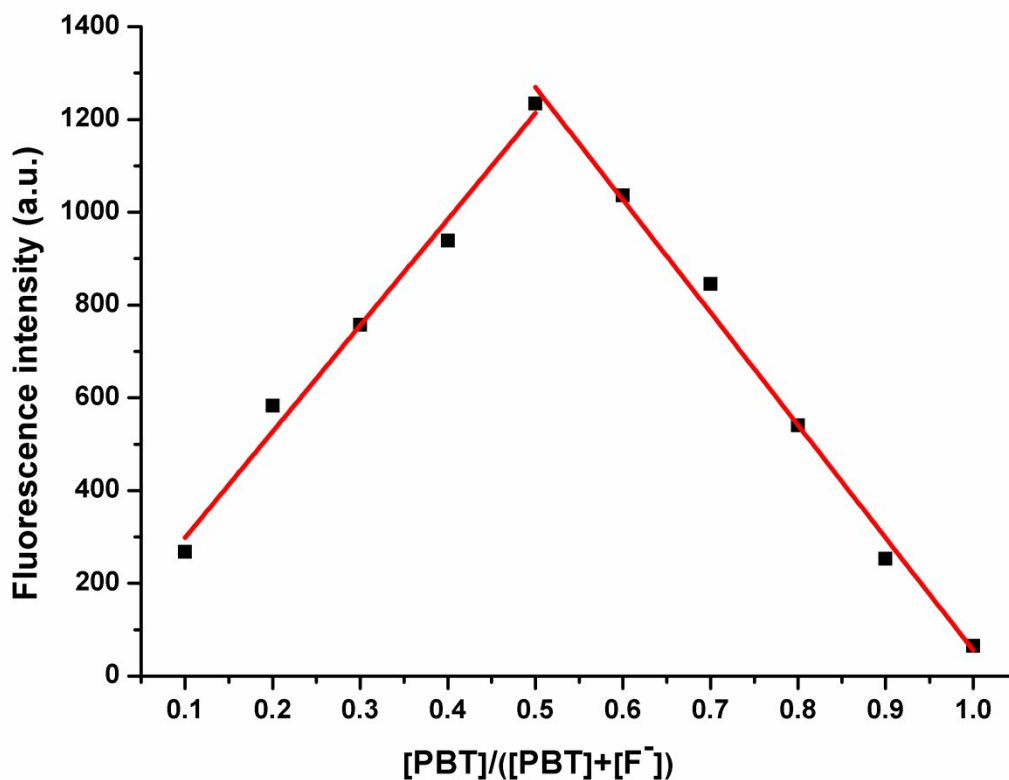

**Fig. S12.** Job's plot for determining the stoichiometry of **PBT** and F<sup>-</sup>. The total concentration of **PBT** and F<sup>-</sup> was 10  $\mu$ M in a mixture of THF and Tris buffer solution (pH 8.0), (1 : 9, v / v) at 25 °C.  $\lambda_{\text{ex}}$ =335 nm,  $\lambda_{\text{em}}$ =470 nm.

### Kinetic studies:

The reaction of **PBT** (10  $\mu\text{M}$ ) with  $\text{F}^-$  in THF (pH 8.0, 90 % Tris-HCl) was monitored using the fluorescence intensity at 470 nm. The reaction was carried out at 25  $^\circ\text{C}$ . The *pseudo*-first-order rate constant for the reaction was determined by fitting the fluorescence intensities of the samples to the *pseudo*-first-order equation:

$$\text{Ln} [(F_t - F_{\text{min}}) / F_{\text{min}}] = -k't$$

Where  $F_t$  and  $F_{\text{min}}$  are the fluorescence intensities at 470 nm at time  $t$  and the maximum value obtained after the reaction was complete.  $k'$  is the *pseudo*-first-order rate constant. The *pseudo*-first-order plots for the reaction of **PBT** with 2 equiv. of  $\text{F}^-$  is shown in Fig. S13, the *pseudo*-first-order rate constant  $k' = 1/t_f = 0.01269 \text{ min}^{-1}$ .

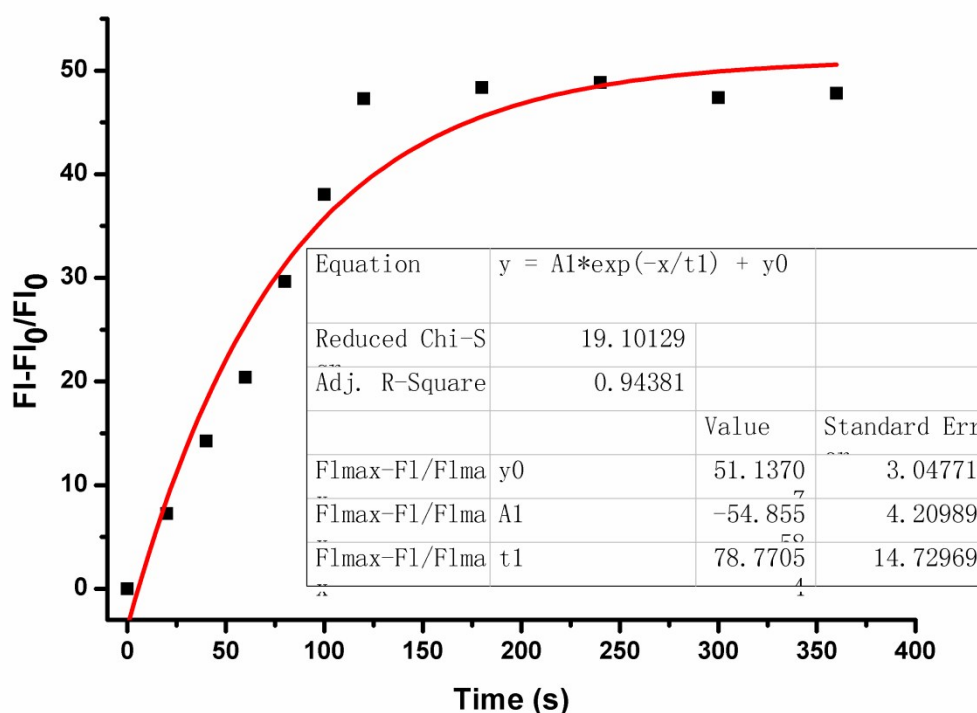

**Fig. S13.** *Pseudo*-first-order kinetic plot of the reaction of **PBT** (10  $\mu\text{M}$ ) with  $\text{F}^-$  (2 equiv.) a mixture of THF and Tris buffer solution (pH 8.0), (1 : 9, v / v) at 25  $^\circ\text{C}$ .  $k' = 0.01269 \text{ min}^{-1}$ .

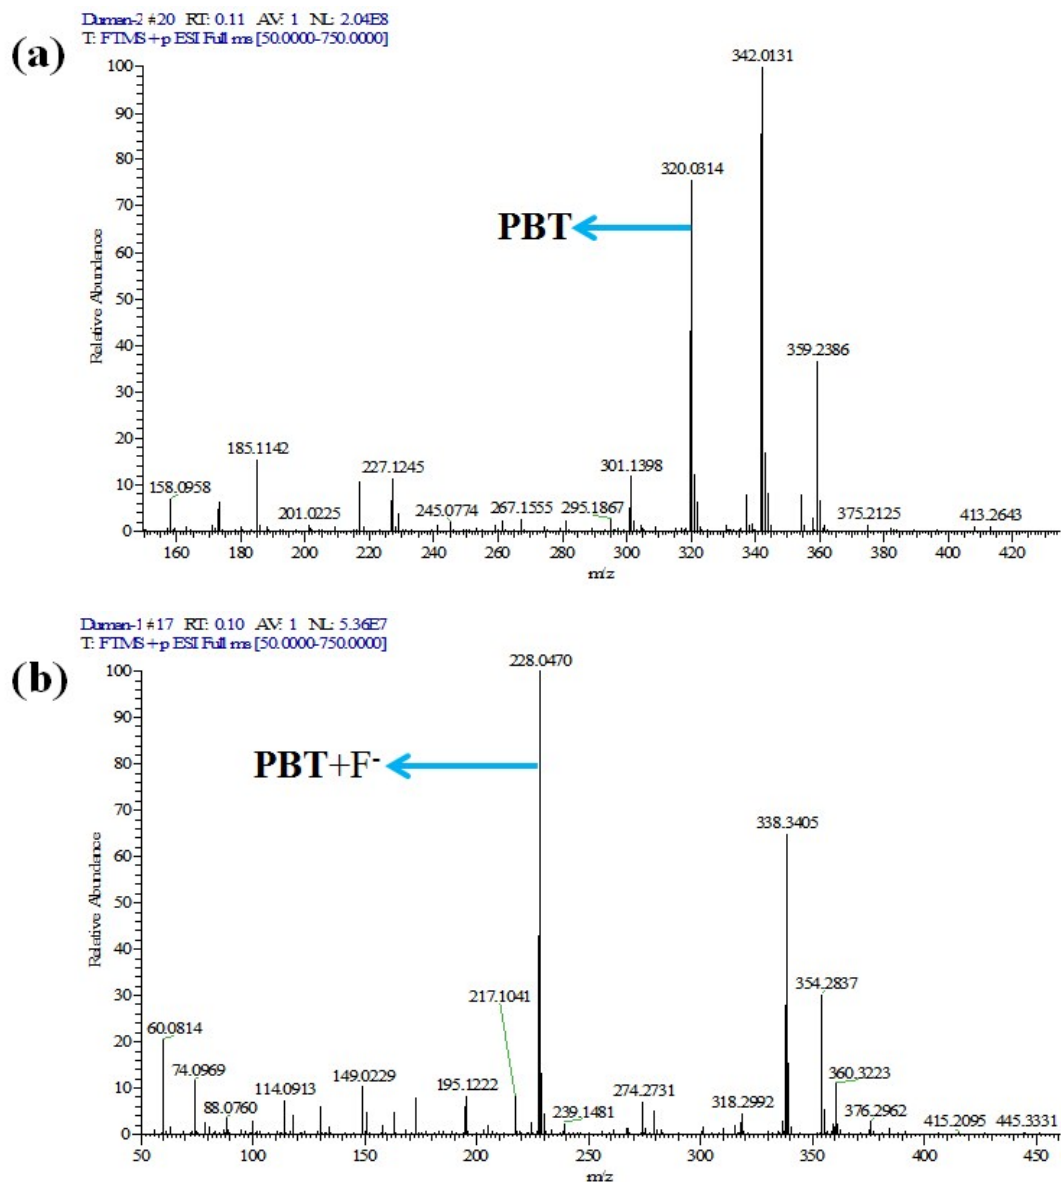

**Fig. S14.** ESI-MS spectrum (positive ion mode) of **PBT** upon addition of  $F^-$  in  $CH_3CN$ . (a) only **PBT**, (b) the isolated aggregates of compound after **PBT** reacted with  $F^-$  for 10 min.

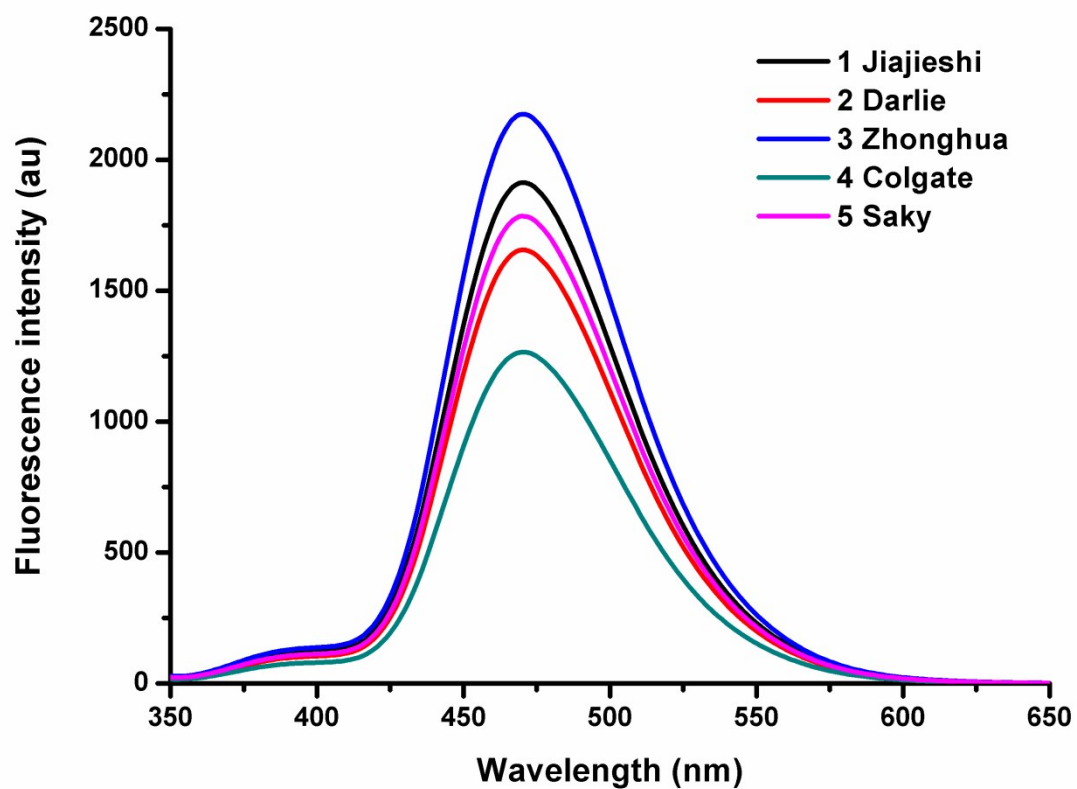

**Fig. S15.** The fluorescence spectra change of **PBT** upon addition of  $F^-$  from toothpastes 1, 2, 3, 4, 5 and 6.  $\lambda_{ex}=335$  nm,  $\lambda_{em}=470$  nm.

## References

- [1] H. Y. Kim, H. G. Im and S. K. Chang, *Dyes and Pigments*, 2015, **112**, 170-175.
- [2] X. X. Chen, T. H. Leng, C. Y. Wang, Y. J. Shen and W. H. Zhu, *Dyes and Pigments*, 2017, **141**, 299-305.
- [3] M. Bineci, M. Baglan and S. Atilgan, *Sensors and Actuators B*, 2016, **222**, 315-319.
- [4] B. W. Ke, W. X. Wu, L. Wei, F. B. Wu, G. Chen, G. He and M. Y. Li, *Anal. Chem.*, 2015, **87**, 9110-9113.
- [5] Y. M. Shen, X. Y. Zhang, Y. Y. Zhang, H. T. Li and Y. D. Chen, *Sens. Actuators, B*, 2018, **258**, 544-549.
- [6] L. Fu, F. F. Wang, T. Gao, R. Huang, H. He, F. L. Jiang and Y. Liu, *Sens. Actuators, B*, 2015, **216**, 558-562.
- [7] X. L. Yu, L. L. Yang, T. T. Zhao, R. L. Zhang, L. Yang, C. L. Jiang, J. Zhao, B. H. Liu and Z. P. Zhang, *RSC Adv.*, 2017, **7**, 53379-53384.
- [8] E. S. Luis, O. T. Adrian, K. Y. Anatoly and P. L. Georgina, *Anal. Lett.*, 2016, **49**, 2301-2311.
- [9] M. M. Yu, J. Xu, C. Peng, Z. X. Li, C. X. Liu and L. H. Wei, *Tetrahedron*, 2016, **72**, 273-278.
- [10] X. J. Zheng, W. C. Zhu, H. Ai, Y. Huang and Z. Y. Lu, *Tetrahedron Lett.*, 2016, **57**, 5846-5849.
- [11] J. Tao, P. Zhao, Y. H. Li, W. J. Zhao, Y. Xiao and R. H. Yang, *Anal. Chim. Acta*, 2016, **918**, 97-102.
- [12] Shweta, A. Kumar, Neeraj, S. K. Asthana and K. K. Upadhyay, *New J. Chem.*, 2017, **41**, 5098-5104.
- [13] Y. J. Li, Q. Sun, L. Su, L. L. Yang, J. Zhang, L. Yang, B. H. Liu, C. L. Jiang and Z. P. Zhang, *RSC Adv.*, 2018, **8**, 8688-8693.
